# Supplementary material for: Promoter Variations Strongly Enhance the Transcription Level of the BoLMI1 Gene, Causing Lobed Leaves in Ornamental Kale (Brassica Oleracea L. Var. Acephala)
Source: Research Square preprint supplement (doi:10.21203/rs.3.rs-512886/v1), 2021-06-03
Supplement: Supplementary file 1 [file 0d0221b2ee5019748e03de27.docx]

All original, full-length gel and blot images


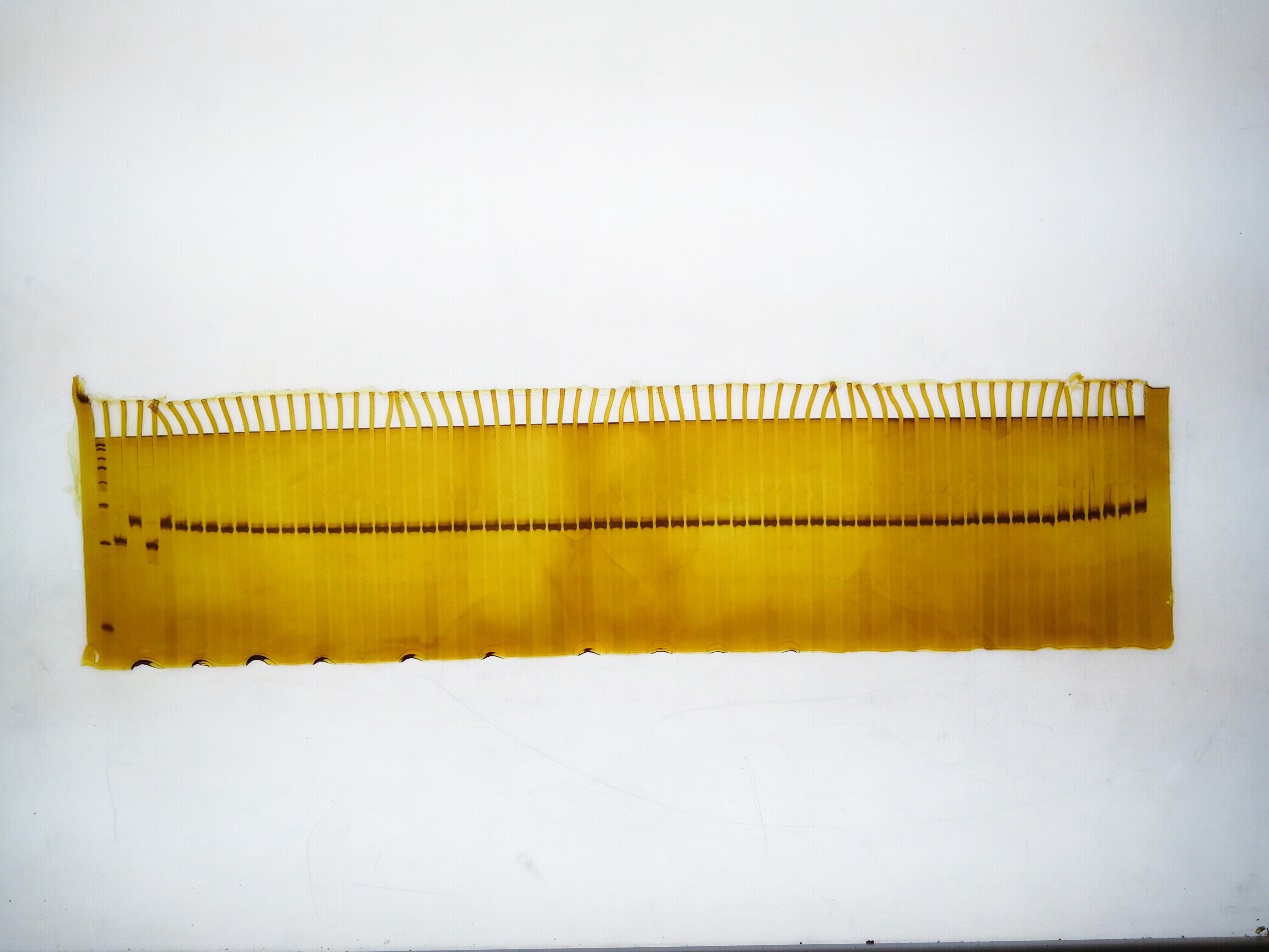


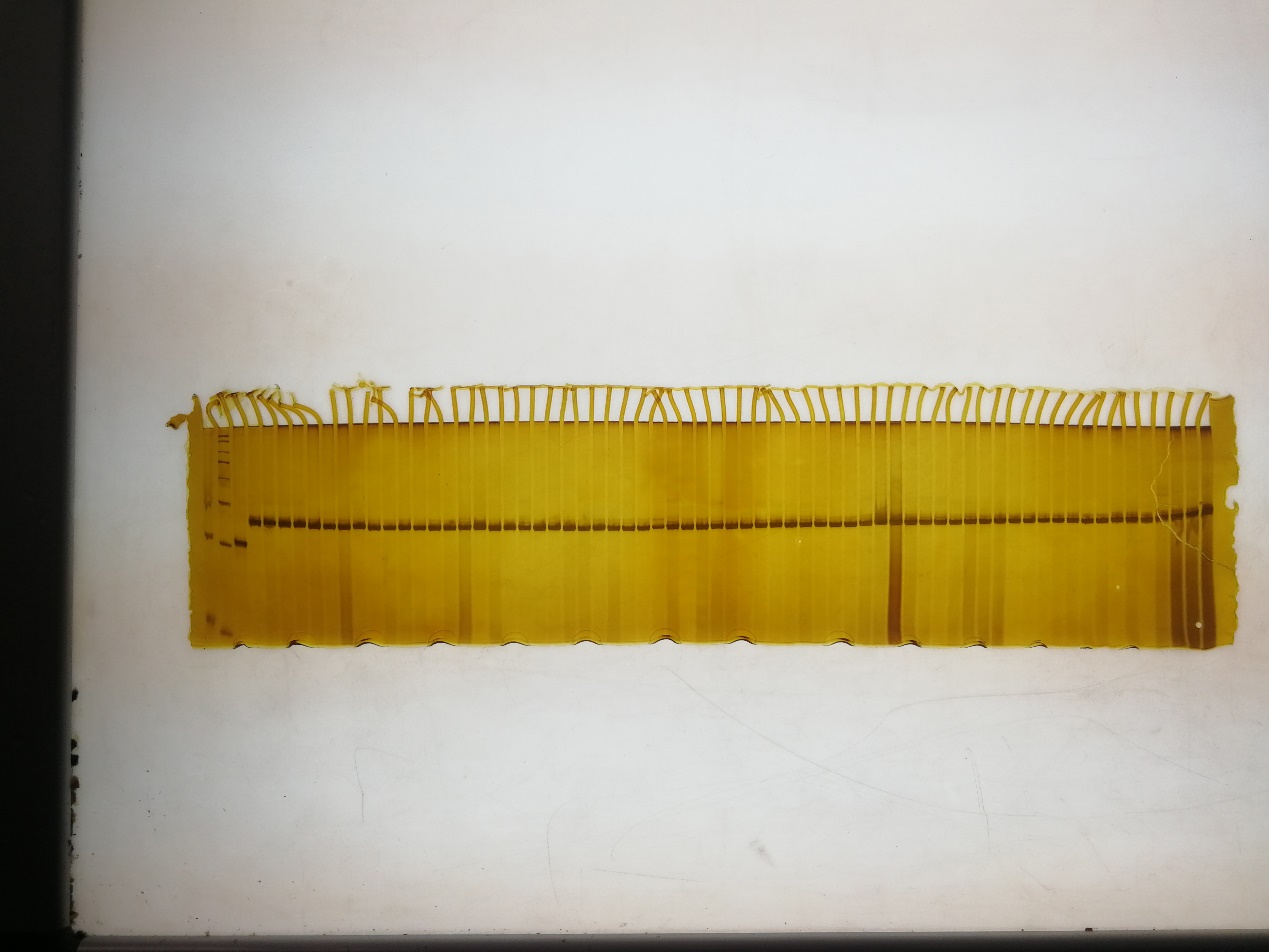


**Fig. 6** Amplicons of the co-dominant marker CMLMI1 in parents and 118 different cabbage inbred lines and ornamental kale inbred lines 2523.


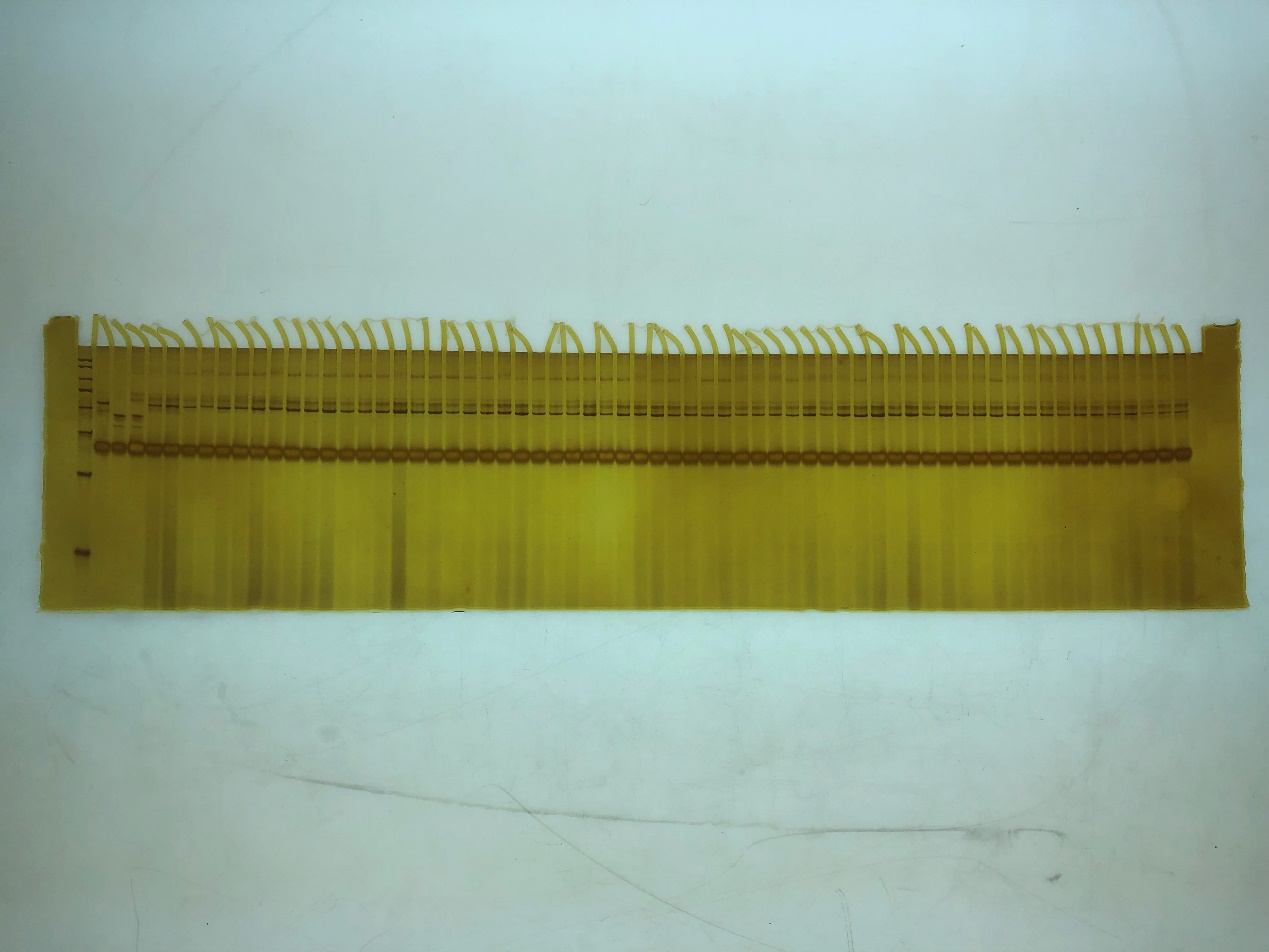


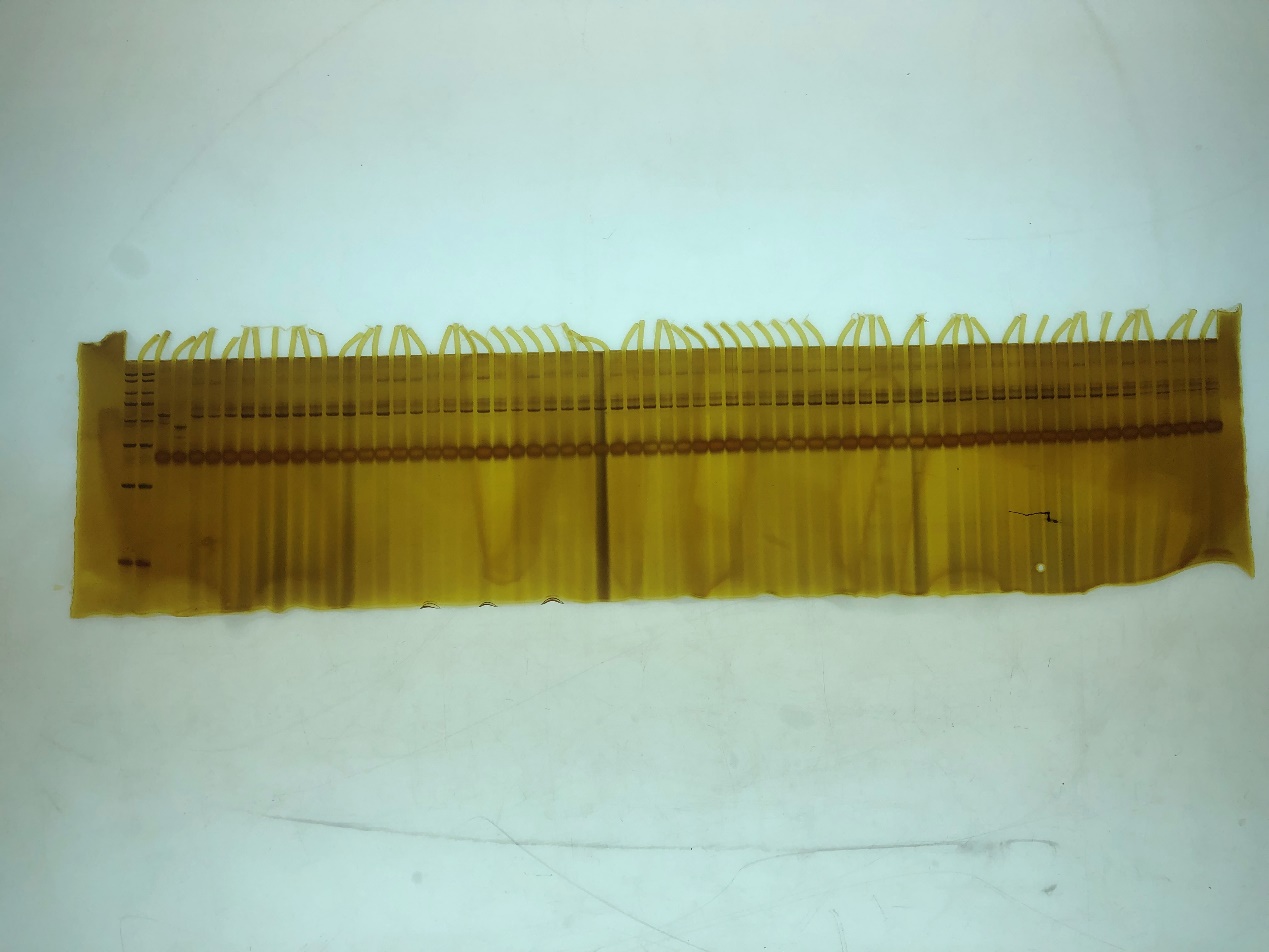


**Figure S1.** Amplicons of the dCAPS marker DMLMI1 in parents and 118 different cabbage inbred lines and ornamental kale inbred lines 2523.
